# Supplementary material
Source: ML conference proceedings conference paper supplement (https://proceedings.neurips.cc/paper_files/paper/2020/hash/0ec96be397dd6d3cf2fecb4a2d627c1c-Abstract.html)
Supplement: Supplementary file 5 [file 0ec96be397dd6d3cf2fecb4a2d627c1c-Supplemental.zip]

Archive with 2 entries (2 files):
- qrnn-code.tar.gz
- QRNN-suppl.pdf
