# Supplementary material
Source: ML conference proceedings conference paper supplement (https://proceedings.neurips.cc/paper_files/paper/2020/hash/0ec96be397dd6d3cf2fecb4a2d627c1c-Abstract.html)

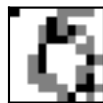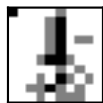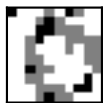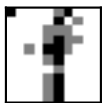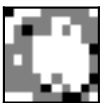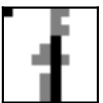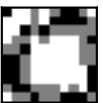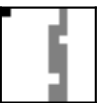

Supplement: Supplementary file 1 [file 0ec96be397dd6d3cf2fecb4a2d627c1c-Supplemental.zip]

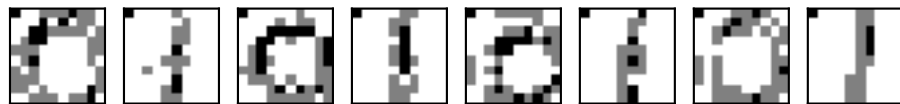

Supplement: Supplementary file 2 [file 0ec96be397dd6d3cf2fecb4a2d627c1c-Supplemental.zip]

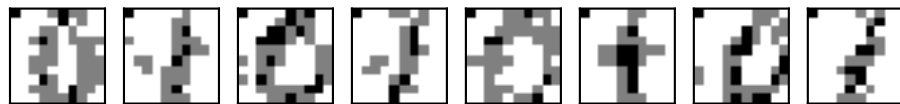

Supplement: Supplementary file 3 [file 0ec96be397dd6d3cf2fecb4a2d627c1c-Supplemental.zip]
